# Supplementary material for: Safety and Immunogenicity Following Administration of a Live, Attenuated Monovalent 2009 H1N1 Influenza Vaccine to Children and Adults in Two Randomized Controlled Trials
Source: PubMed Central journal article supplement (PMC2966412; doi:10.1371/journal.pone.0013755), 2010-10-29

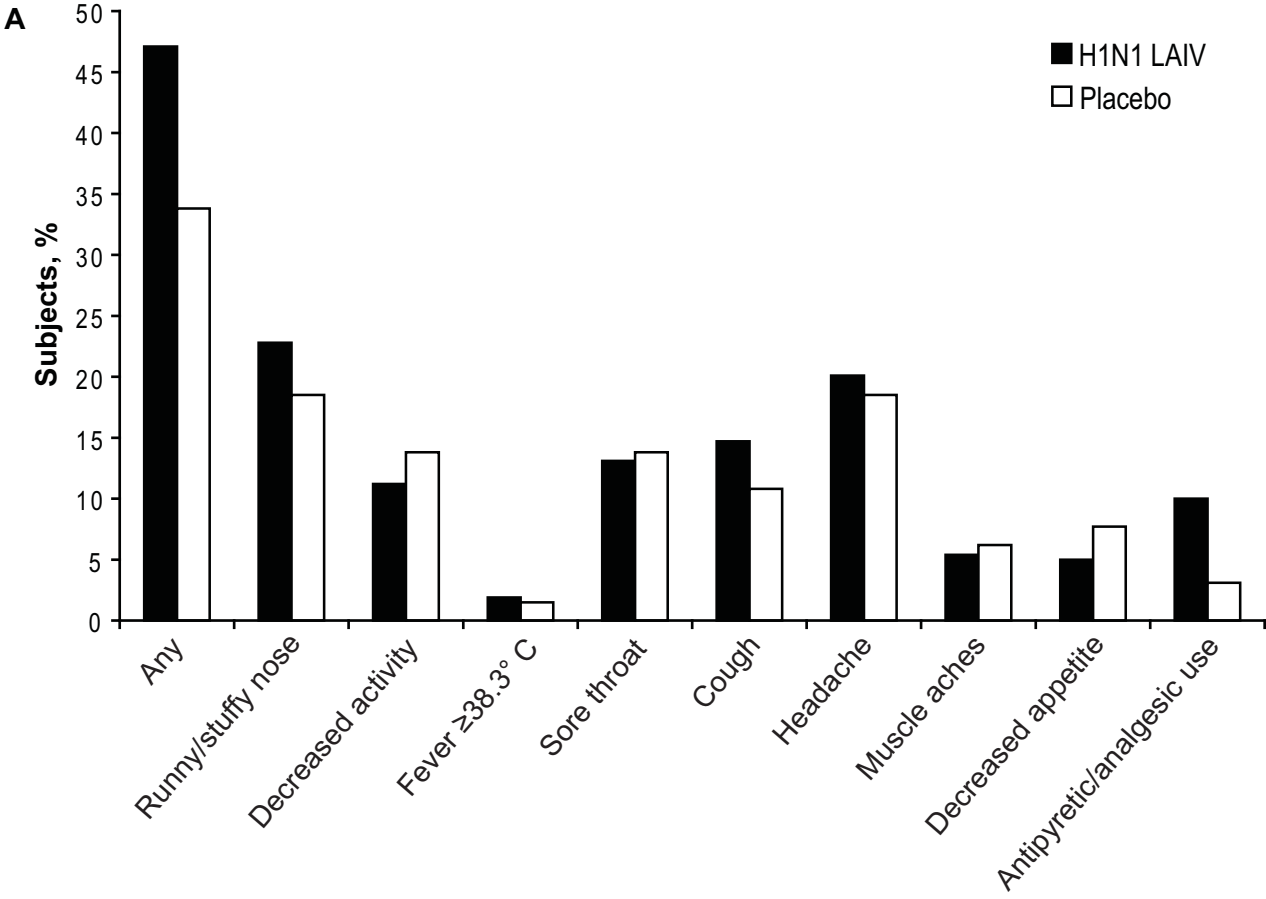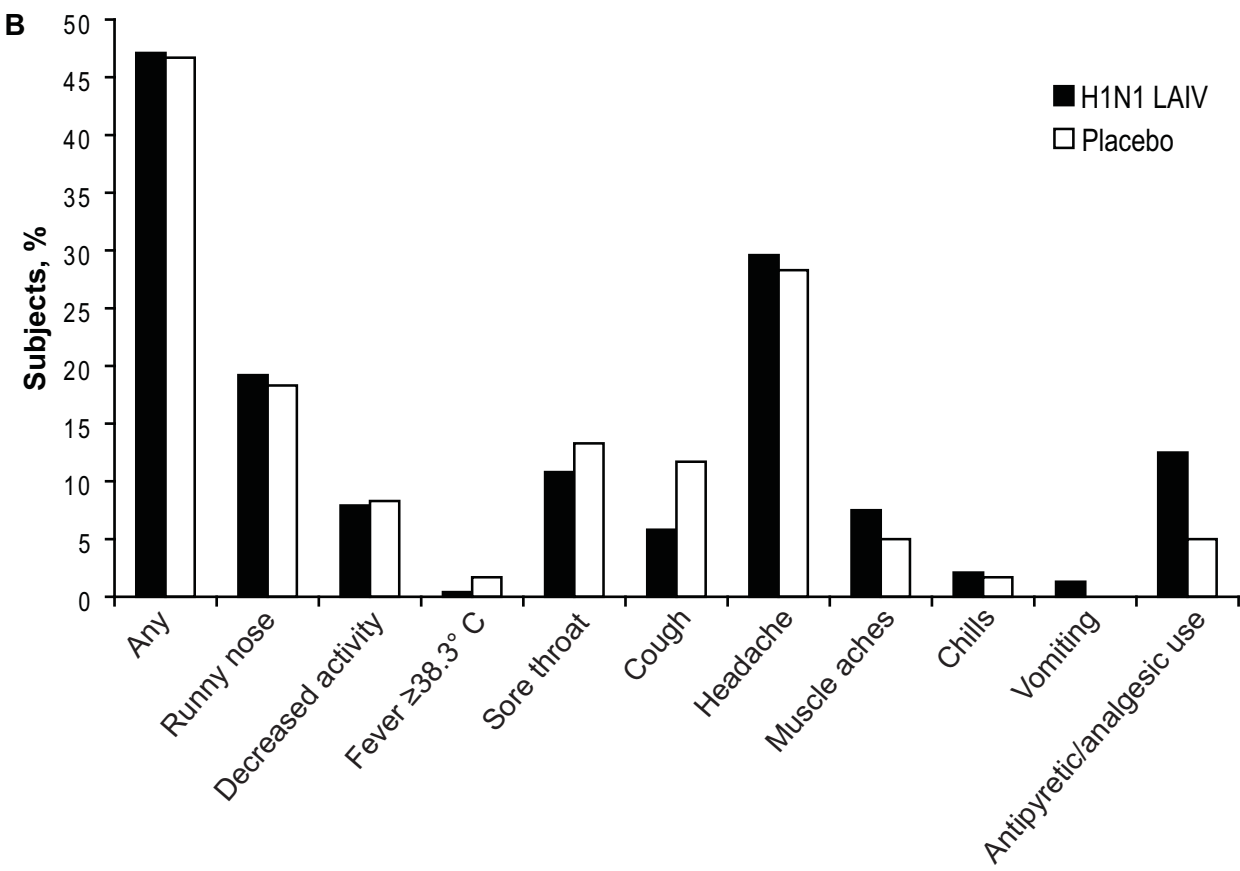

Supplement: pone.0013755.s001.pdf [file pone.0013755.s001.pdf]
